# Supplementary material for: Soft-lithographic patterning of room temperature-sintering Ag nanoparticles on foil
Source: Royal Society of Chemistry journal article supplement (doi:10.1039/c3ra43926g), 2013-01-01
Supplement: c3ra43926g.pdf [file c3ra43926g.pdf]

## Supplementary Information

# Soft-Lithographic Patterning of Room Temperature-Sintering Ag Nanoparticles on Foil

Pieter F. Moonen,<sup>a</sup> Erhan Bat,<sup>a</sup> Pim Voorthuijzen,<sup>b</sup> Jurriaan Huskens\*<sup>a</sup>

<sup>a</sup>Molecular Nanofabrication Group, University of Twente, P.O.Box 217, 7500 AE Enschede, The Netherlands. Fax: +31 (0)53 4894645; Tel: +31 (0)53 489 2995; E-mail: [J.Huskens@utwente.nl](mailto:J.Huskens@utwente.nl)

<sup>b</sup>Holst Centre/ TNO, High Tech Campus 31, 5656 AE Eindhoven, The Netherlands.

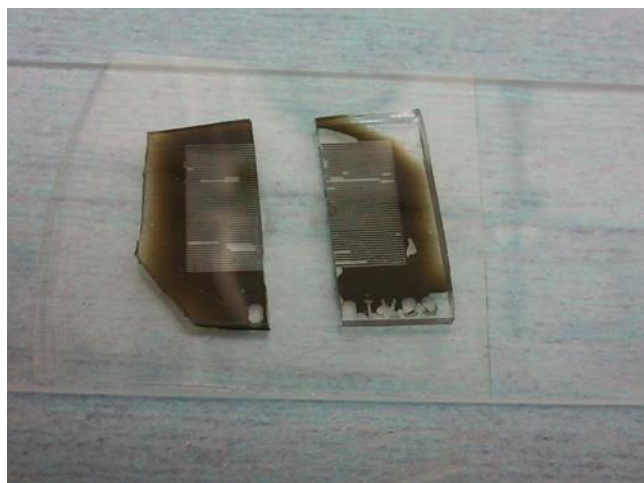

**Fig.S1** Photograph showing the MIMIC process with a patterned PDMS stamp on a PET foil. The Ag-PAA NP ink clearly filled the channels and exited the channel on the other side of the channel opening at which the ink was introduced.

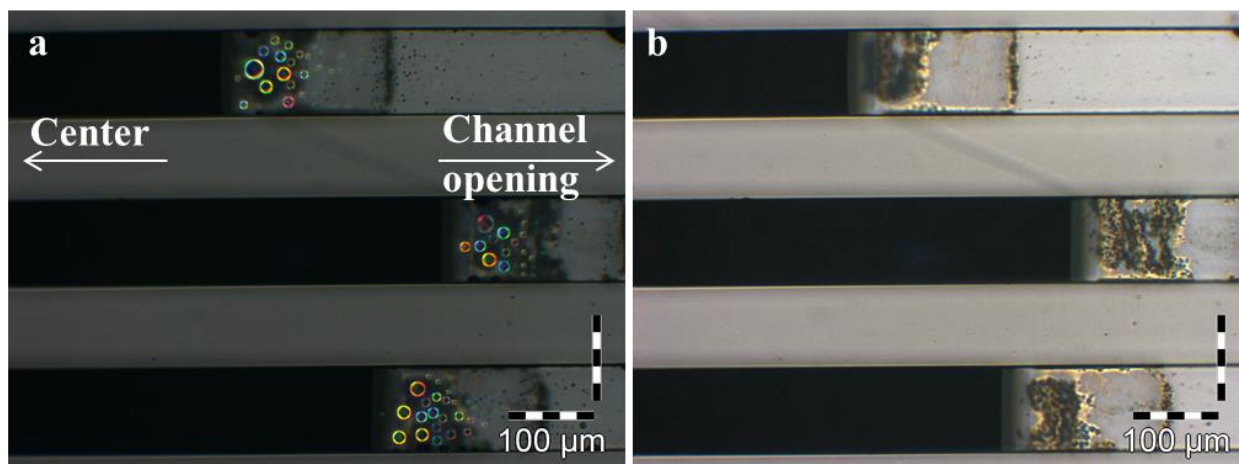

**Fig.S2** Microscopy images in reflection mode showing the moving front at nearly the identical moment in a MIMIC formed channel upon solvent evaporation in two different focus planes (a, b). Ag-PAA NP ink is dragged upon solvent evaporation from the channel openings towards the center of the channel.

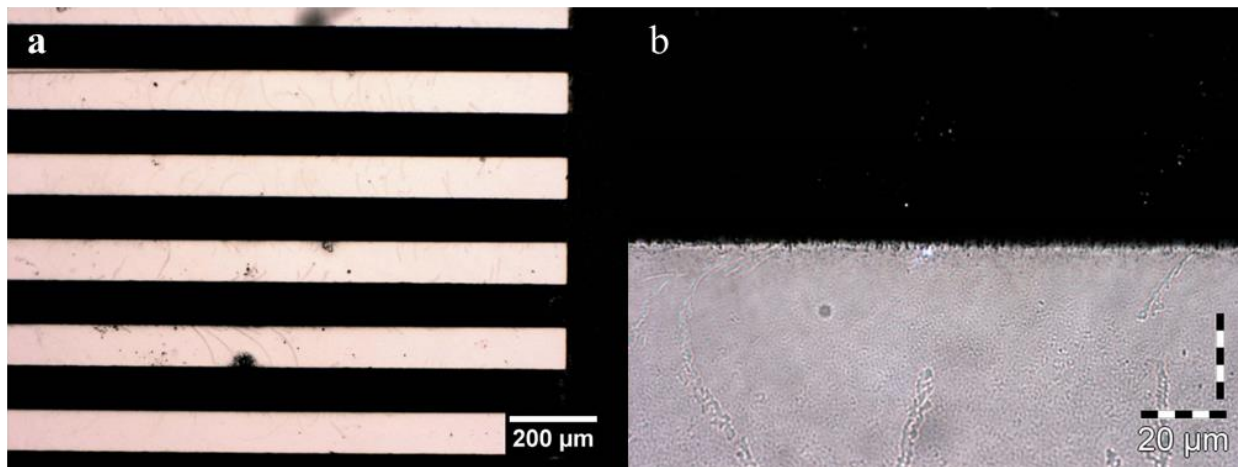

**Fig.S3** Transmission microscopy images of (a, b) MIMIC-patterned Ag wires from Ag-PAA NPs dispersed in MeOH. (b) magnified image of (a) showing the line edge roughness of the patterned wire.

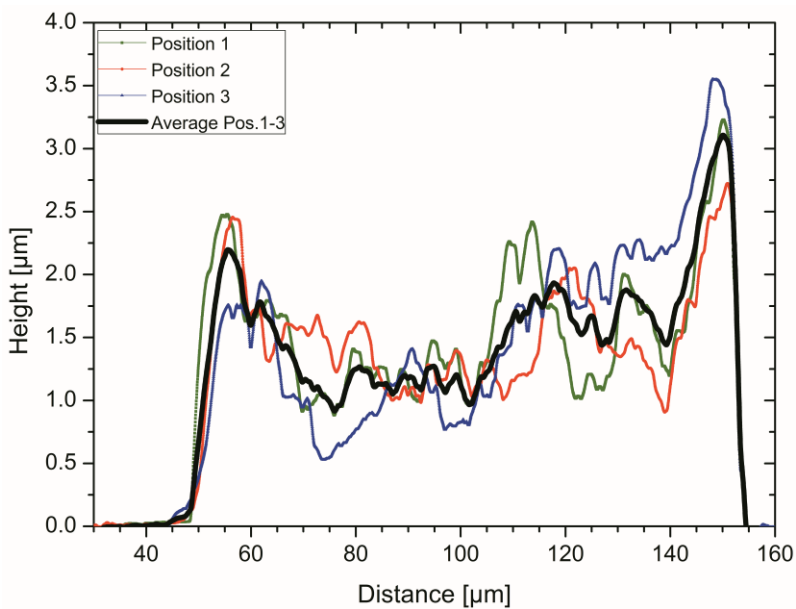

**Fig S4** Cross-sectional profiles at several positions of a sintered, MIMIC-patterned Ag wire from Ag-PAA NPs dispersed in MeOH and their average.

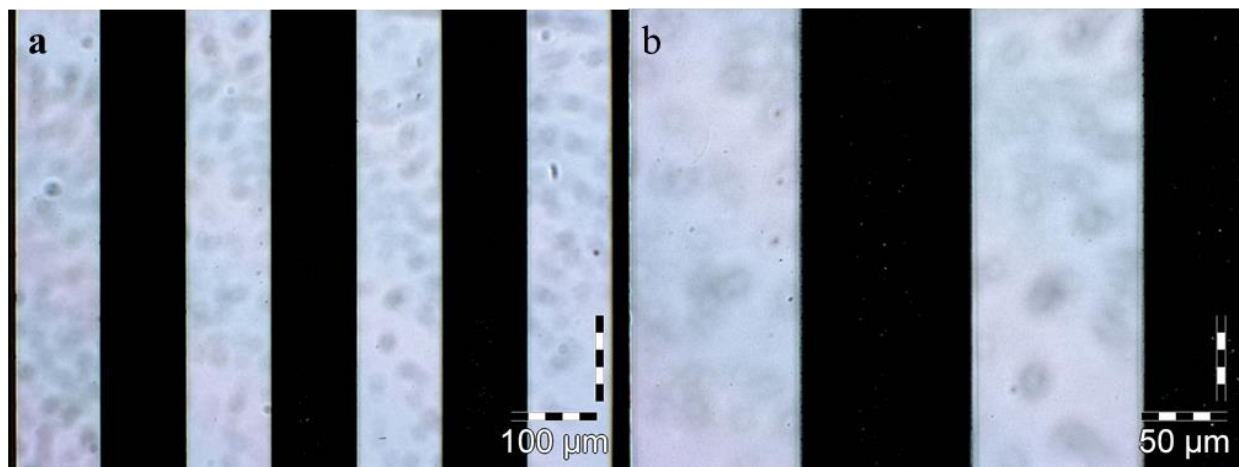

**Fig.S5** Transmission microscopy images of (a, b) sintered Ag wires formed in SU8 channels on PET foil from Ag-PAA NPs dispersed in water. (b) magnified image of (a).

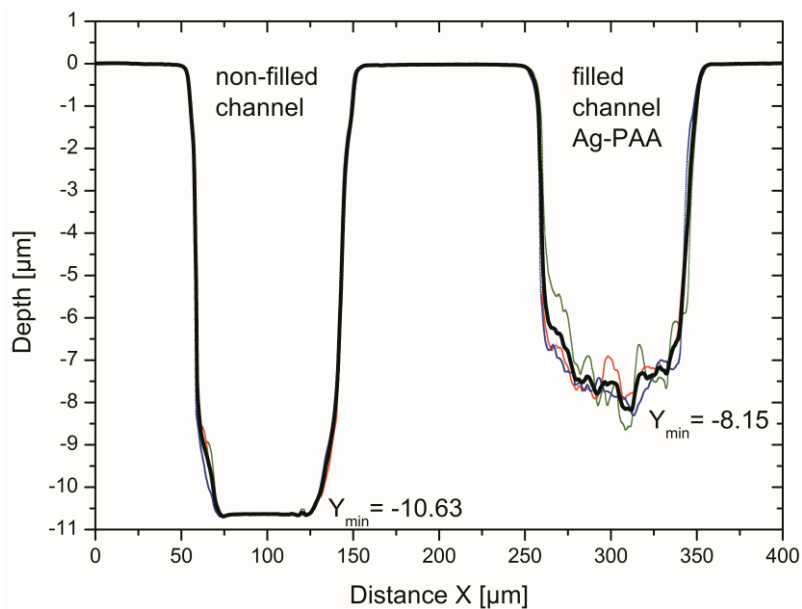

**Fig S6** Cross-sectional profiles at three positions of a sintered Ag wire and their average in black for a non-filled and filled SU8 microchannel.
